# Supplementary material for: Construction of a bioluminescence-based assay for bitter taste receptors (TAS2Rs)
Source: PubMed Central journal article supplement (PMC9587021; doi:10.1038/s41598-022-21678-3), 2022-10-21
Supplement: 41598_2022_21678_MOESM1_ESM.pdf [file 41598_2022_21678_MOESM1_ESM.pdf]

**Supplementary Information for**  
**Construction of a bioluminescence-based assay for bitter taste receptors**  
**(TAS2Rs)**

Shi Min Tan, Wei-Guang Seetoh\*

Taste Receptors Platform, Singapore Institute of Food and Biotechnology Innovation  
(SIFBI), Agency for Science, Technology and Research (A\*STAR), 61 Biopolis  
Drive, Proteos, Singapore 138673

Corresponding author

\*Email: [seetoh\\_wei\\_guang@sifbi.a-star.edu.sg](mailto:seetoh_wei_guang@sifbi.a-star.edu.sg)

**Supplementary Table S1.** Amino acid sequences of the SST<sub>3</sub>-TAS2Rs used in this study.

SST<sub>3</sub> signal sequence (underlined)

Linker (in italics)

Flag tag (in bold)

| <b>Bitter taste receptor</b> | <b>Amino acid sequence</b>                                                                                                                                                                                                                                                                                                                                                                                                      |
|------------------------------|---------------------------------------------------------------------------------------------------------------------------------------------------------------------------------------------------------------------------------------------------------------------------------------------------------------------------------------------------------------------------------------------------------------------------------|
| TAS2R3                       | <u>MAAVTYPSSVPTTLDPGNASSAWPLDTSLGNASAGTSLAGLAVSGLEMGL</u> TEGVFLILSGTQFTLGILVNCFI<br>ELVNGSSWFKTKRMSLSDFIITLALLRIILLCHILTDSFLIEFSPNTHDSGIHQIIDVSWTFTNHLISWLATCLG<br>VLYCLKIASFSHPTFLWLKWRVSRVMVWMLL GALLSCGSTASLINEFKLYSVFRGIEATRNVTEHFRKKRS<br>EYYLIHVLGTLWYLPPLIVSLASYSLLIFSLGRHTRQMLQNGTSSRDPTTEAHKRAIRIILSFFFLFLYFLAFLI<br>ASFGNFLPKTKMAKMIGEVMTMFYPAGHSFILILGNSKLLKQTFVVMRLRCESGHLKPGSKGPIFSDY <b>KDDDD</b><br><b>K</b>    |
| TAS2R4                       | <u>MAAVTYPSSVPTTLDPGNASSAWPLDTSLGNASAGTSLAGLAVSGLELRL</u> FYFSAIIASVILNFVGIIMNLFIT<br>VVNCKTWVKSHRISSDRILFSLGITRFLMLGLFLVNTIYFVSSNTERSIVYLSAFFVLCFMFLDSSSVWFVTLL<br>NILYCVKITNFQHSVFLLLKRNISPKIPRLLACVLISAFTTCLYITLSQASPFPELVTRNNTSFNISEGILSLVV<br>SLVLSLQFIINVTASLLIHSRRHIQMQKNATGFWNPQTEAHVGAMKLMVYFLILYIPYSVATLVQYLP<br>FYAGMDMGTKSICLIFATLYSPGHSVLIITHPKLKTAKKILCFKKDY <b>KDDDDK</b>                                        |
| TAS2R5                       | <u>MAAVTYPSSVPTTLDPGNASSAWPLDTSLGNASAGTSLAGLAVSGLELSAGL</u> GLLMLVAVVEFLIGLIGNGS<br>LVVWSFREWIRKFNWSSYNLIILGLAGCRFLQWLIILDLSLFLFQSSRWLRYLSIFWVLVSQASLWFATFL<br>SVFYCKKITTFDRPAYLWLKQRAYNLSLWCLLGYFIINLLTVQIGLTFYHPPQGNSSIRYPFESWQYLYAFQ<br>LNSGSYLPLVVFLVSSGMLIVSLYTHHKMKVHSAGRRDVRAKAHITALKSLGCFLLHLLVYIMASPFISITS<br>KTYPPDLTSVFIWETLMAAYPSLHSLILIMGIPRVKQTCQKILWKTVCARRCWGPDY <b>KDDDDK</b>                                  |
| TAS2R7                       | <u>MAAVTYPSSVPTTLDPGNASSAWPLDTSLGNASAGTSLAGLAVSGLEADK</u> VQTTLFLAVGEFSVGILGNA<br>FIGLVN CMDWVKKRKIASIDLITSLAISRICLLCVILLDCFILVLYPDVYATGKEMRIIDFFWTLTNHLISWFA<br>TCLSIYFFFKIGNFFHPLFLWMKWRIDRVISWILLGCVVLSVFISLPATENLNADFRFCVKAKRKTNLTWSCR<br>VNKTQHASTKLFLNLATLLPFCVCLMSFFLLILSLRRHIRMQLSATGCRDPSTEAHVRAALKAVISFLLLFIAY<br>YLSFLIATSSYFMPETELAVIFGESIALIYPSSHSFILILGNKLRHASLKVIVKVMVMSILKGRKFQHQKQIDY <b>KD</b><br><b>DDDK</b> |

|               |                                                                                                                                                                                                                                                                                                                                                                                                              |
|---------------|--------------------------------------------------------------------------------------------------------------------------------------------------------------------------------------------------------------------------------------------------------------------------------------------------------------------------------------------------------------------------------------------------------------|
| TAS2R8        | MAAVTYPSSVPTTLDPGNASSAWPLDTSLGNASAGTSLAGLAVSGLEFSPADNIFIILITGEFILGILGNGYIAL<br>VNWIDWIKKKKISTVDYILTNLVIARICLISVMVVNGIVIVLNPDVYTKNKQQIVIFTFWTFANYLNMWITTC<br>LNVFYFLKIASSSHPLFLWLKWKIDMVVHWILLGCF AISLLVSLIAAIVLSCDYRFHAI AKHKRNITEMFHVS<br>KIPYFEPLTLFNLFAIVPFIVSLISFFLLVRSLWRHTKQIKLYATGSRDPSTEVHVRAIKTMTSFIFFFFLYYISSI<br>LMTFSYLMTKYKLA VEFGEIAAILYPLGHSLLIVLNNKLRQTFVRMLTCRKIACMIDYKDDDDK                |
| TAS2R9 (A187) | MAAVTYPSSVPTTLDPGNASSAWPLDTSLGNASAGTSLAGLAVSGLEPSAIEAIYIILIAGELTIGIWGNGFIV<br>LVNCIDWLKRRDISLIDIILISLAISRICLLCVISLDGFFMLLPFGTYGNSVLVSIVNVVWTFANSSSLWFTSCLS<br>IFYLLKIANISHPPFFWLKWKINKVMLAILLGSFLISLIISVPKNDDMWYHLFKVSHEENITWKFVKSKIPGTFK<br>QLTLNLGAMVPFILCLISFFLLLFSLVRHTKQIRLHATGFRDPSTEAHMRAIKAVIIFLLLLLIVYYPVFLVMTSS<br>ALIPQGKLVLMIGDIVTVIFPSSHFILMGN SKLRE AFLKMLRFVKCFLRRRKPFVVPDYKDDDDK             |
| TAS2R10       | MAAVTYPSSVPTTLDPGNASSAWPLDTSLGNASAGTSLAGLAVSGLELRVVEGIFIVVSESVFGVLGNGFI<br>GLVNCIDCAKNKLSTIGFILTGLAISRIFLIWIIITDGFIIQIFSPNIYASGNLIEYISYFWVIGNQSSMWFATLSIF<br>YFLKIANFSNYIFLWLKSRNTMVL PFMIVFLLISSLLNFAYIAKILNDYKTKNDTVWDLNMYKSEYFIKQILL<br>NLGVIFFFTL SLITCIFIISLWRHNRQM QSNTVGLRDSNTEAHVKAMKVLISFIILFIFYFIGMAIEISCFTVRE<br>NKLLLMFGMTTIAIYPWGH SFILILGN SKLKQASLRVLQQLKCCEKRKNLRVTDYKDDDDK                  |
| TAS2R13       | MAAVTYPSSVPTTLDPGNASSAWPLDTSLGNASAGTSLAGLAVSGLEESALPSIFTLVIIAEFIIGNLSNGFIVL<br>INCIDWVSKRELSSVDKLLIILAISRIGLIWEILVSWFLALHYLAIFVSGTGLRIMIFSWIVSNHFNLWLATIFSIF<br>YLLKIASFSSPAFLYLKWRVNVK VILMILLGTLVFLFLNLIQINMHIKDWLDRYERNTTWNFSMSDFETFSVSV<br>KFTMTMFSLTPFTVAFISFLLLIFSLQKHLQKMQLNKYGHRDPRTKVHTNALKIVISFLLFYASFFLCVLISWI<br>SELYQNTVIYMLCETIGVFSPSSH FLLILGNAKLRQAFLLVAAKVWAKRDYKDDDDK                      |
| TAS2R14       | MAAVTYPSSVPTTLDPGNASSAWPLDTSLGNASAGTSLAGLAVSGLEGGVIKSIFTFVLIVEFIIGNLGN SFIA<br>LVNCIDWVKGRKISSVDRI LTAL AISRISLVWLIFGWCVS VFFPALFATEKMFRMLTNIWTVINHFSVWLAT<br>GLGTFYFLKIANFSNSIFLYLKWRVKKVVLVLLLVTSVFLFLNIALINIHNASINGYRRNKTCSDDSSNFTRFS<br>SLIVLTSTVFIFIPFTLSLAMFLLLIFSMWKHRKKMQHTVKISGDASTKAHRGVKSVITFFLLY AIFSLSFFISV<br>WTSERLEENLIILSQVMGMAYPSCHSCV LILGNKLRQASLSVLLWLR YMFKDGEP SGHKEFRESSDYKDD<br>DDK |
| TAS2R16       | MAAVTYPSSVPTTLDPGNASSAWPLDTSLGNASAGTSLAGLAVSGLEIPIQLTVFFMIIYVLES LTIIVQSSLIV<br>AVLGREWLQVRRLMPVDMILISLGISRFCLQWASMLNNFCSYFNLN YVLCNL TITWEFFNITFWLNSLLTV<br>FYCIKVSSFTHHIFLWLRWRILRLFPWILLGSLMITCVTIIPSAIGNYIQIQLLTMEHLPRNSTVTDKLENFHQY                                                                                                                                                                     |

|                |                                                                                                                                                                                                                                                                                                                                                                                                                                          |
|----------------|------------------------------------------------------------------------------------------------------------------------------------------------------------------------------------------------------------------------------------------------------------------------------------------------------------------------------------------------------------------------------------------------------------------------------------------|
|                | QFQAHTVALVIPFILFLASTIFLMASTKQIQHHSTGHCPNSMKARFTALRSLAVLFIVFTSYFLTILITIIGTLF<br>DKRCWLWVWEAFVYAFILMHSTSLMLSSPTLKRILKGK <b>CDYKDDDDK</b>                                                                                                                                                                                                                                                                                                   |
| TAS2R20        | <u>MAAVTYPSSVPTTLDPGNASSAWPLDTSLGNASAGTSLAGLAVSGLEMSFLHIVFSILVVVAFILGNFANGFI<br/>ALINFIAWVKRQKISSADQIIAALAVSRVGLLWVILLHWYSTVLNPTSSNLKVIIFISNAWAVTNHFSIWLATS<br/>LSIFYLLKIVNFSRLIFHHLKRKAKSVVLVIVLGSFLFLVCHLVMKHTYINWTEECEGNVTWKIKLRNAMH<br/>LSNLTVAMLANLIPFTLTLISFLLLIYSLCKHLKMKQLHGKGSQDPSTKIHIALQTVTSFLILLAIYFLCLIISF<br/>WNFKMRPKEIVLMLCQAFGIIYPSFHSFILIWGNKTLKQTFLSVLWQVTCWAKGQNQSTP<b>DYKDDDDK</b></u>                              |
| TAS2R30        | <u>MAAVTYPSSVPTTLDPGNASSAWPLDTSLGNASAGTSLAGLAVSGLEITFLPIIFSILIVVIFVIGNFANGFIAL<br/>VNSIEWVKRQKISFVDQILTALAVSRVGLLWVLLLHWYATQLNPAFYSVEVRITAYNVWAVTNHFSWLA<br/>TSLSMFYLLRIANFSNLIFLRIKRRVKSIVLVILLGPLLFLVCHLFVINMDETVWTKEYEGNVTWKIKLRSAM<br/>YHSNMTLMLANFVPLTLTLISFLLLICSLCKHLKMKQLHGKGSQDPSTKVHIKALQTVTSFLLCAIYFLSM<br/>IISVCNFRLEKQPVMFCQAIIFSYPSTHPFILILGNKKLKQIFLSVLRHVRYWVKDRSLRLHRFTRGALCVF<br/><b>DYKDDDDK</b></u>                  |
| TAS2R31 (WMVI) | <u>MAAVTYPSSVPTTLDPGNASSAWPLDTSLGNASAGTSLAGLAVSGLETTFIPIIFSSVVVLFVIGNFANGFIA<br/>LVNSIEWVKRQKISFADQILTALAVSRVGLLWVLLLNWYSTVFNPAFYSVEVRTTAYNVWAVTGHSNWL<br/>ATLSIFYLLKIANFSNLIFLHLKRRVKSIVLVMLLGPLLFLACQLFVINMKEIVRTKEYEGNMTWKIKLRS<br/>VYLSDATVTTLGNLVPFTLTLLCFLLLICSLCKHLKMKQLHGKGSQDPSTKVHIKVLQTVIFFLLCAIYFLSI<br/>MISVWSFGSLENKPVFMFCAIRFSYPSIHPFILIWGNKKLKQTFLSVLRQVRYWVKGEKPSSP<b>DYKDDDDK</b></u>                                  |
| TAS2R38 (PAV)  | <u>MAAVTYPSSVPTTLDPGNASSAWPLDTSLGNASAGTSLAGLAVSGLELTLTRIRTVSYEVRSTFLFISVLEFA<br/>VGFLTNAFVFLVNFWDVVKRQPLSNSDCVLLCLISRLFLHGLLFLSAIQLTHFQKLSEPLNHSYQAIIMLWM<br/>IANQANLWLAACLSLLYCSKLIRFSHTFLICLASWVSRKISQMLLGIILCSCICTVLCVWCFFSRPHFTVTTVL<br/>FMNNNTRLNWQNKDLNLFYSFLFCYLWSVPPFLFLVSSGMLTVSLGRHMRTMKVYTRNSRDPSLEAHIK<br/>ALKSLVSFFCFVVISSCAAFISVPLLILWRDKIGVMVCVGIMAACPSGHAAVLISGNAKLRRAVMTILLWAQS<br/>SLKVRADHKADSRTL<b>CDYKDDDDK</b></u> |
| TAS2R39        | <u>MAAVTYPSSVPTTLDPGNASSAWPLDTSLGNASAGTSLAGLAVSGLELGRCFPPDTKEKQQLRMTKLCDDPA<br/>ESELSPFLITLILAVLLAEYLIGIANGFIMAIHAAEWWQNKAVSTSGRILVFLSVSRIALQSLMMLEITISSTLS<br/>FYSEDAVYYAFKISFIFLNFCSLWFAAWLSFFYFVKIANFSYPLFLKLRWRITGLIPWLLWLSVFISFHSMF<br/>NICTVYCNSFPPIHSSNSTKKTYLSEINVVGLAFFFNLGIVTPLIMFILATLLILSLKRHTLHMGSNATGSNDP<br/>SMEAHMGAIKAISYFLILYIFNAVALFIYLSNMFIDINSLWNNLCQIIMAAYPASHSILLIQDNPGLRRAWKRL</u>                               |

|         |                                                                                                                                                                                                                                                                                                                                                                                                             |
|---------|-------------------------------------------------------------------------------------------------------------------------------------------------------------------------------------------------------------------------------------------------------------------------------------------------------------------------------------------------------------------------------------------------------------|
|         | <u>QLRLHLYPKEWTL</u> <b>DYKDDDDK</b>                                                                                                                                                                                                                                                                                                                                                                        |
| TAS2R43 | <u>MAAVTYPSSVPTTLDPGNASSAWPLDTSLGNASAGTSLAGLAVSGL</u> <i>EITFLPIIFSSLVVVTFVIGNFANGFIALVNSIEWFKRQKISFADQILTALAVSRVGLLWVLLLNWYSTVLNPAFNSVEVRTTAYNIWAVINHFSNWLATTLSIFYLLKIANFSNFIFLHLKRRVKSIVLVMLLGPLLFLACHLFVINMNEIVRTKEFEGNMTWKIKLKSAMYFSNMTVTMVANLVPFTLTLLSFMLLICSLCKHLKMKQLHGKGSQDPSTKVHIKALQTVISFLLLCAIYFLSIMISVWSFGSLENKPVFMFCKAIRFSYPSIHPFILIWGNKCLKQTFLSVFWQMRYWVKGEKTSSP<b>DYKDDDDK</b></i>           |
| TAS2R46 | <u>MAAVTYPSSVPTTLDPGNASSAWPLDTSLGNASAGTSLAGLAVSGL</u> <i>EITFLPIIFSILIVVTFVIGNFANGFIALVNSIEWFKRQKISFADQILTALAVSRVGLLWVLLLNWYATELNPAFNSIEVRITAYNVWAVINHFSNWLATLSLSIFYLLKIANFSNLIFLHLKRRVKSIVLVILLGPLLFLVCHLFVINMNQIIWTKEYEGNMTWKIKLRSAMYLSNTTVTILANLVPFTLTLLISFLLLICSLCKHLKMKQLHGKGSQDPSMKVHIKALQTVTSFLLLCAIYFLSIIMS</i> <b>VWSFESLENKPVFMFCEAIAFSYPSTHPFILIWGNKCLKQTFLSVLWHVRYWVKGEKPSS</b> <b>DYKDDDDK</b> |
| TAS2R50 | <u>MAAVTYPSSVPTTLDPGNASSAWPLDTSLGNASAGTSLAGLAVSGL</u> <i>EITFLYIFFSILIMVLFVLGNFANGFIALVNFIDWVKRKKISSADQILTALAVSRIGLLWALLLNWYLTVLNPAFYVELRITSYNWVVTNHFSMWLANLSIFYLLKIANFSNLLFLHLKRRVRSVILVILLGTLIFLVCHLLVANMDESMWAEYEGNMTGKMKLRNTVHLSYLTVTTLWSFIPFTLSLISFLMLICSLCKHLKMKQLHGEGSQDLSTKVHIKALQTLISFLLLCAIFFLFLIVSVWSPRRLRNDPVVMVSKAVGNIYLAFDSFILIWRTKCLKHTFLLILCQIR<b>CDYKDDDDK</b></i>                         |

**Supplementary Table S2.** Putative signal sequences of 55 non-olfactory Class A GPCRs used in the study.

| Gene name | Protein name                             | Receptor            | Putative signal sequence                                     |
|-----------|------------------------------------------|---------------------|--------------------------------------------------------------|
| ADRA2A    | Alpha-2A adrenergic receptor             | $\alpha_{2A}$       | MGSLQPDAGNASWNGTEAPGGGARATPYSLQVT                            |
| BDKRB2    | B2 bradykinin receptor                   | B <sub>2</sub>      | MLNITSQVLAPALNGSVSQSSGCPNTEWSGWLNVIQ                         |
| C5AR1     | C5a anaphylatoxin chemotactic receptor 1 | C5a <sub>1</sub>    | MDSFNYYTTPDYGHYDDKDTLDLNTPVDKTSNT                            |
| CCKBR     | Gastrin/cholecystokinin type B receptor  | CCK <sub>2</sub>    | MDLLKLNRSLQGPGPSGSSLCRPGVSLNSSSAGNLSCEPRIRGTGTRELELTIR       |
| CCR1      | C-C chemokine receptor type 1            | CCR1                | METPNTTEDYDTTTEFDYGDATPCQKVNERAFGA                           |
| CCR10     | C-C chemokine receptor type 10           | CCR10               | MGTEATEQVSWGHYSGDEEDAYSAAEPLPELCYKADVQAFSRAFQPSVSLTVA        |
| CCR2      | C-C chemokine receptor type 2            | CCR2                | MLSTSRSRFIRNTNESGEEVTTFFDYDYGAPCH                            |
| CCR3      | C-C chemokine receptor type 3            | CCR3                | MTTSLDVTVEFTGTTSSYYDDVGLLCEKADTRALMA                         |
| CCR4      | C-C chemokine receptor type 4            | CCR4                | MNPTDIADTTLDESIYSNYLYYESIPKPCTKEGIKAF                        |
| CCR6      | C-C chemokine receptor type 6            | CCR6                | MSGESMNFSDVFDSSSEDFVSVNTSYYSVDSEMLLCSLQEVQRQFSRL             |
| CCR8      | C-C chemokine receptor type 8            | CCR8                | MDYTLDLSTVTTVTDYYPDIFSSPCDAELIQTNKG                          |
| CHRM3     | Muscarinic acetylcholine receptor M3     | M <sub>3</sub>      | MTLHSNSTTSPFLPNISSSWVHSPSEAGLPLGTVTQLGSYNISQETGNFSSNDTSSDPLG |
| CX3CR1    | CX3C chemokine receptor 1                | CX <sub>3</sub> CR1 | MSTSFPELDLENFEYDDSAEACYLGDIVAFGT                             |
| CXCR1     | C-X-C chemokine receptor type 1          | CXCR1               | MSNITDPQMWFDFDDLNFTGMPPADEDYSPCMLETETLNK                     |
| CXCR2     | C-X-C chemokine receptor type 2          | CXCR2               | MEDFNMESDSFEDFWKGEDLSNYSYSTLPPFLDAAPCEPESLEINK               |
| CXCR3     | C-X-C chemokine receptor type 3          | CXCR3               | MVLEVSDHQVLNDAEVAALLENFSSSYDYGENESDSCCTSPPCQDFSLNFDR         |
| CXCR5     | C-X-C chemokine receptor type 5          | CXCR5               | MNYPLTLEMDLENLEDFWELDRLDNYNDTSLVENHLCPATEGPLMASFKAVFV        |
| CXCR6     | C-X-C chemokine receptor type 6          | CXCR6               | MAEHDYHEDYGFSSFNDSQEEHQDFLQFSKV                              |
| GALR1     | Galanin receptor type 1                  | GAL <sub>1</sub>    | MELAVGNLSEGNASWPEPPAPEPGPLFGIGVENFVT                         |
| GNRHR     | Gonadotropin-releasing hormone receptor  | GnRH <sub>1</sub>   | MANNASLEQDPNHCSAINNSIPLIQKLPPLTVSGKIR                        |
| GPER1     | G-protein coupled estrogen receptor 1    | GPER                | MDVTSQARGVGLEMPGTAQPAAPNTTSPENLNSHPLLGTALANGTGELSEHQYVIGLFLS |
| GPR12     | G-protein coupled receptor 12            | GPR12               | MNEDLKVNLSGLPRDYLDAAAENISAAVSSRVPAVEPEPELVVNPW               |
| GPR182    | G-protein coupled receptor 182           | GPR182              | MSVIPSSRPVSTLAPDNDFREIHNWTELLHLFNQTFSDCHMELNENTKQVVLF        |
| GPR20     | G-protein coupled receptor 20            | GPR20               | MPSALSMRPWDAALPNTTAAAWTNGSVPEMPLFHHFARLDEELQAT               |
| GRPR      | Gastrin-releasing peptide receptor       | BB <sub>2</sub>     | MAPNNCSHLNLDVDPFLSCNDTFNQSLSPKMDNWFHPG                       |
| HCRTR1    | Orexin receptor type 1                   | OX <sub>1</sub>     | MEPSATPGPQMGVPTGVGDPSLVPPDYEEEEFLSYLWRDYLYPKQYE              |
| HRH3      | Histamine H3 receptor                    | H <sub>3</sub>      | MERAPPDGPLNASGALAGEAAAAGGARGFSAAWTAVLAA                      |

|         |                                                  |                    |                                                                         |
|---------|--------------------------------------------------|--------------------|-------------------------------------------------------------------------|
| HTR1A   | 5-hydroxytryptamine receptor 1A                  | 5-HT <sub>1A</sub> | MDVLSPGQGNNTTSPAPFETGGNTTGISDVTVSYQ                                     |
| HTR1B   | 5-hydroxytryptamine receptor 1B                  | 5-HT <sub>1B</sub> | MEEPGAQCAPPPAGSETWVPQANLSSAPSQNCSTAKD                                   |
| HTR1D   | 5-hydroxytryptamine receptor 1D                  | 5-HT <sub>1D</sub> | MSPLNQSAEGLPQEASNRSLNATETSEAWDPRTLQAL                                   |
| HTR2A   | 5-hydroxytryptamine receptor 2A                  | 5-HT <sub>2A</sub> | MDILCEENTSLSTTNSLMQLNDDTRLYSNDFNSGEANTSDAFNWTVDSENRTNLSCE<br>GCLSPSCLSL |
| HTR2B   | 5-hydroxytryptamine receptor 2B                  | 5-HT <sub>2B</sub> | MALSYRVSELQSTIPEHILQSTFVHVISSNWSGLQTESIPEEMKQIV                         |
| KISS1R  | KiSS-1 receptor                                  | kisspeptin         | MAAEATLGPVNSWWAPSNASGCPGCGVNASDGPASAPRPLDAWLVP                          |
| MAS1L   | Mas-related G-protein coupled receptor           | MAS1L              | MVWGKICWFSQRAGWTVFAESQISLSCSLCLHSGDQEAQNPNLVSQLCGVFLQNETN               |
| MC3R    | Melanocortin receptor 3                          | MC <sub>3</sub>    | MNSSCCLSSVSPMLPNLSEHPAAPPASNRSGSGFCEQ                                   |
| MLNR    | Motilin receptor                                 | motilin            | MGSPWNGSDGPEGAREPPWPALPPCDERRCSPFPL                                     |
| MRGPRD  | Mas-related G-protein coupled receptor member D  | MRGPRD             | MNQTLNSSGTVESALNYSRSTVHTAYLVLSL                                         |
| MRGPRX2 | Mas-related G-protein coupled receptor member X2 | MRGPRX2            | MDPTTPAWGTESTTVNGNDQALLLCCGKETLIP                                       |
| MTNR1B  | Melatonin receptor type 1B                       | MT <sub>2</sub>    | MSENGSFANCCEAGGWAVRPGWWSGAGSARPSRTPRPP                                  |
| NPBWR1  | Neuropeptides B/W receptor type 1                | NPBW <sub>1</sub>  | MHNLSLFEPGRGNVSCGGPFLGCPNESNPAPLPLPQPLA                                 |
| NPSR1   | Neuropeptide S receptor                          | NPS                | MPANFTEGSFDSNGTGQMLDSSPVACTETVTFTEVVEGKEWGSFYYSFKTEQ                    |
| NPY1R   | Neuropeptide Y receptor type 1                   | Y <sub>1</sub>     | MNSTLFSKVENHSIHYNASENSPLAFENDDCH                                        |
| NPY2R   | Neuropeptide Y receptor type 2                   | Y <sub>2</sub>     | MGPIGAEADENQTVEMKVEQYGPQTPRGELVPDPEPELIDSTKLIQVQV                       |
| OPN5    | Opsin-5                                          | OPN5               | MALNHTALPQDERLPHYLRDGPFAKLSWEAD                                         |
| OPRL1   | Nociceptin receptor                              | NOP                | MEPLFPAPFWEVIYGSHLQGNLSLLSPNHSLLPPHLLLNASHGAFLPL                        |
| OXGR1   | 2-oxoglutarate receptor 1                        | oxoglutarate       | MIETLDSPANDSDFLDYITALENCTDEQISFKMQYLP                                   |
| P2RY13  | P2Y purinoceptor 13                              | P2Y <sub>13</sub>  | MTAAIRRQRELSILPKVTLEAMNTTVMQGFNRSERCPDRTRIVQLVFPA                       |
| PRLHR   | Prolactin-releasing peptide receptor             | PrRP               | MASLPTQGPAAPDFFNGLLPASSSPVNSQSETVVGNGSAAGPGSQAITPFQSLQLVHQL<br>KGL      |
| PROKR1  | Prokineticin receptor 1                          | PKR <sub>1</sub>   | METTMGMDDNATNTSTSFSLVNLNPHGAHATSFPFNFSYSDYDMPLDEDEDVTNSRTF<br>FAAK      |
| PROKR2  | Prokineticin receptor 2                          | PKR <sub>2</sub>   | MAAQNGNASFPANFSIPQEHASSLPFNFSYDDYDLPLDEDEDMTKTQTFFAAK                   |
| PTGDR2  | Prostaglandin D2 receptor 2                      | DP <sub>2</sub>    | MANITLKPLCPLLEEMVQLPNHSNSSLRYIDHVS                                      |
| RHO     | Rhodopsin                                        | rhodopsin          | MNGTEGPNFYVPFSNKTGVVRSFPFEPQYYLAE                                       |
| S1PR1   | Sphingosine 1-phosphate receptor 1               | S1P <sub>1</sub>   | MGPTSVPVKAHRSSVSDYVNYDIIVRHYNYTGKLNISADKENSIK                           |

|       |                              |                  |                                               |
|-------|------------------------------|------------------|-----------------------------------------------|
| SSTR3 | Somatostatin receptor type 3 | SST <sub>3</sub> | MAAVTYPSSVPTTLDPGNASSAWPLDTSLGNASAGTSLAGLAVSG |
| SSTR5 | Somatostatin receptor type 5 | SST <sub>5</sub> | MEPLSLTSTPSWNASAASSSSHNSLVDPVSPMGA            |



**Supplementary Table S3.** Amino acid sequences of the HiBiT-tagged TAS2R constructs used in the cell surface expression study.

Signal sequence (underlined, where X denotes amino acid sequence of the signal sequence in Supplementary Table S2)

Linker (in italics)

HiBiT tag (in bold)

| <b>Bitter taste receptor</b> | <b>Amino acid sequence</b>                                                                                                                                                                                                                                                                                                                                                                                                                                                         |
|------------------------------|------------------------------------------------------------------------------------------------------------------------------------------------------------------------------------------------------------------------------------------------------------------------------------------------------------------------------------------------------------------------------------------------------------------------------------------------------------------------------------|
| TAS2R20                      | <u>X</u> <i>EFGGGSGGSSGGV</i> <b>SGWRLF</b> <b>KKISGGSGGGGSGGSSSGG</b> <i>/DMSFLHIVFSILVVVAFILGNFANGFIALINFI</i><br><i>AWVKRQKISSADQIIAALAVSRVGLLWVILLHWYSTVLNPTSSNLKVIIFISNAWAVTNHFSIWLATSLSIFYL</i><br><i>LKIVNFSRLIFHHLKRKAKSVVLVIVLGSLLFLVCHLVMKHTYINVWTEECEGNVTWKIKLRNAMHLSNLT</i><br><i>VAMLANLIPFTLTLISFLLLIYSLCKHLKMKQLHGKGSQDPSTKIHICALQTVTSFLILLAIYFLCLISFWNFK</i><br><i>MRPKEIVLMLCQAFGIIYPSFHSFILIWGNKTLKQTFLSVLWQVTCWAKGQNQSTP</i>                                    |
| TAS2R38 (PAV)                | <u>X</u> <i>EFGGGSGGSSGGV</i> <b>SGWRLF</b> <b>KKISGGSGGGGSGGSSSGG</b> <i>/DLTLTRIRTVSYEVRSTFLFISVLEFAVGFLT</i><br><i>NAFVFLVNFWDVVKRQPLSNSDCVLLCLISRLFLHGLLFLSAIQLTHFQKLEPLNHSYQAIIMLWMIANQA</i><br><i>NLWLAACLSELLYCSKLIRFSHTFLICLASWVSRKISQMLLGIILCSCICTVLCVWCFFSRPHFTVTTVLFMNNN</i><br><i>TRLNWQNKDLNLFYSFLFCYLWSVPPFLLFLVSSGMLTVSLGRHMRTMKVYTRNSRDPSLEAHIKALKSLV</i><br><i>SFFCFFVISSCAAFISVPLLILWRDKIGVMVCVGMACPSGHA AVLISGNAKLRRAVMTILLWAQSSLKVRA</i><br><i>DHKADSR TLC</i> |
| TAS2R50                      | <u>X</u> <i>EFGGGSGGSSGGV</i> <b>SGWRLF</b> <b>KKISGGSGGGGSGGSSSGG</b> <i>/DITFLYIFFSILIMVLFVLGNFANGFIALVNFI</i><br><i>DWVKRKKISSADQILTALAVSRIGLLWALLLNWYLTVLNPAFYVELRITSYNAWVVTNHFSMWLAANLSI</i><br><i>FYLLKIANFSNLLFLHLKRRVRSVILVILLGTLIFLVCHLLVANMDESMWAEYEGNMTGKMCLRNTVHLS</i><br><i>YLTVTTLWSFIPFTLSLISFLMLICSLCKHLKMKQLHGEGSQDLSTKVHIKALQTLISFLLLC AIFFLIVSVW</i><br><i>SPRRLRNDPVVMVSKAVGNIYLA FDSFILIWRTKCLKHTFLLILCQIRC</i>                                               |

**Supplementary Table S4.** EC<sub>50</sub> values of TAS2R agonists. Values indicate the mean ± s.e.m. (n = 2-4).

| Bitter Receptor | Compound                 | EC <sub>50</sub> values |                | Published EC <sub>50</sub> values                                           |
|-----------------|--------------------------|-------------------------|----------------|-----------------------------------------------------------------------------|
|                 |                          | 293AD                   | AD-293         |                                                                             |
| TAS2R3          | Chloroquine diphosphate  | 45 ± 14 μM              | -              | 172 ± 29 μM <sup>1</sup>                                                    |
| TAS2R4          | Stevioside               | 7 ± 2 mM                | 7 ± 3 mM       | 341 ± 34 μM <sup>2</sup>                                                    |
| TAS2R5          | Epigallocatechin gallate | 47 ± 11 μM              | -              | 12.3 ± 3.63 μM <sup>3</sup>                                                 |
| TAS2R7          | Calcium chloride         | 5 ± 0.5 mM              | 4 ± 1 mM       | 5.27 ± 0.5 mM <sup>4</sup>                                                  |
|                 | Magnesium chloride       | -                       | 75 ± 9 mM      | 6.07 ± 1.07 mM <sup>4</sup><br>10 ± 19.6 mM <sup>5</sup>                    |
|                 | Zinc sulphate            | -                       | 83 ± 11 mM     | 33.36 ± 0.14 mM <sup>4</sup>                                                |
|                 | Manganese (II) chloride  | -                       | 28 ± 5 mM      | 6.59 ± 1.73 mM <sup>4</sup><br>10 ± 1.7 mM <sup>5</sup>                     |
| TAS2R8          | Chloramphenicol          | 18 ± 2.7 μM             | 70 ± 12 μM     | 41 μM <sup>6</sup>                                                          |
|                 | Denatonium benzoate      | -                       | 1 ± 0.1 mM     | -                                                                           |
|                 | Sucralose                | -                       | 11 ± 4 mM      | -                                                                           |
| TAS2R9          | Pirenzepine              | 4 ± 0.4 mM              | -              | 1.8 mM <sup>7</sup>                                                         |
| TAS2R10         | Brucine                  | 21 ± 6.5 μM             | 42 ± 3 μM      | -                                                                           |
| TAS2R13         | Oxyphenonium             | 161 ± 16 μM             | -              | -                                                                           |
| TAS2R14         | Flufenamic acid          | 422 ± 96 nM             | 1,490 ± 481 nM | 137 ± 17 nM <sup>1</sup><br>238 ± 12.9 nM <sup>8</sup>                      |
|                 | Aristolochic acid        | 2.2 ± 1 μM              | -              | -                                                                           |
|                 | Picrotoxinin             | 54 ± 8.4 μM             | -              | 2.6 μM <sup>9</sup><br>13.16 ± 0.93 μM <sup>10</sup><br>18 μM <sup>11</sup> |

|         |                            |              |            |                                                                                                                      |
|---------|----------------------------|--------------|------------|----------------------------------------------------------------------------------------------------------------------|
| TAS2R16 | Salicin                    | 0.4 ± 0.2 mM | 2 ± 0.6 mM | 0.8 ± 0.2 mM <sup>12</sup><br>1.4 ± 0.2 mM <sup>1</sup><br>0.417 mM <sup>13</sup><br>0.22 mM <sup>14</sup>           |
|         | Helicin                    | -            | 3 ± 0.2 mM | 2.3 ± 0.4 mM <sup>1,15</sup>                                                                                         |
|         | Arbutin                    | -            | 5 ± 1.2 mM | 5.5 ± 1.9 mM <sup>12</sup><br>5.8 ± 0.9 mM <sup>1</sup><br>1.34 mM <sup>14</sup>                                     |
|         | Sinigrin                   | -            | 70 ± 18 mM | 0.23 mM <sup>16</sup>                                                                                                |
|         | Phenyl β-D-glucopyranoside | -            | 2 ± 0.1 mM | 1.1 ± 0.1 mM <sup>15</sup><br>0.38 mM <sup>14</sup>                                                                  |
| TAS2R20 | Cromolyn                   | 35 ± 7 μM    | 73 ± 26 μM | 45 ± 25 μM <sup>1</sup><br>64.37 ± 13 μM <sup>17</sup>                                                               |
| TAS2R30 | Amarogentin                | 3 ± 1 μM     | -          | -                                                                                                                    |
| TAS2R31 | Aristolochic acid          | 186 ± 70 nM  | -          | 455 ± 5.3 nM <sup>1</sup><br>130 ± 10 nM <sup>18</sup><br>240 nM (WMVI) <sup>19</sup><br>810 nM (RLAV) <sup>19</sup> |
| TAS2R38 | Propylthiouracil           | 0.9 ± 0.3 μM | 6 ± 2 μM   | 2.1 ± 0.9 μM <sup>1</sup><br>1.5 μM <sup>20</sup><br>2.2 μM <sup>21</sup>                                            |
|         | Phenylthiocarbamide        | -            | 2 ± 0.4 μM | 1.1 ± 0.5 μM <sup>1</sup><br>6 μM <sup>22</sup><br>4.5 μM <sup>20</sup><br>2.3 μM <sup>21</sup>                      |
|         | N-acetylthiourea           | -            | 16 ± 8 μM  | 25 ± 16 μM <sup>1</sup>                                                                                              |
|         | Dimethyl thioformamide     | -            | 79 ± 12 μM | 59 ± 17 μM <sup>1</sup>                                                                                              |

|         |                          |             |                |                                                                                       |
|---------|--------------------------|-------------|----------------|---------------------------------------------------------------------------------------|
| TAS2R39 | Epigallocatechin gallate | 141 ± 44 μM | 362 ± 81 μM    | 8.50 ± 2.84 μM <sup>3</sup><br>161 μM <sup>23</sup><br>181.6 μM <sup>24</sup>         |
| TAS2R43 | Aristolochic acid        | 20 ± 4 nM   | 26 ± 3 nM      | 8 nM <sup>19</sup><br>81 ± 0.8 nM <sup>1</sup>                                        |
|         | Aloin                    | -           | 5 ± 3 μM       | 1.2 μM <sup>19</sup><br>2.8 ± 0.4 μM <sup>1</sup><br>35 μM <sup>21</sup>              |
|         | Caffeine                 | -           | 0.39 ± 0.12 mM | 0.94 ± 0.14 mM <sup>25</sup>                                                          |
| TAS2R46 | Strychnine               | 309 ± 73 nM | 1,201 ± 433 nM | 0.39 ± 0.08 μM <sup>26</sup><br>0.43 ± 0.02 μM <sup>27</sup><br>3.47 μM <sup>28</sup> |
| TAS2R50 | Andrographolide          | 2 ± 0.3 μM  | 16 ± 3 μM      | 22.9 ± 4.9 μM <sup>1</sup>                                                            |

**Supplementary Table S5.** Projected EC<sub>50</sub> of compounds that produced a partial dose-response curve when tested in transfected cells expressing both Gα16-gust44 and mt-clytin II.

| <b>Compound</b>         | <b>EC<sub>50</sub> value</b> |
|-------------------------|------------------------------|
| Brucine                 | 2.3 M                        |
| Chloroquine diphosphate | > 5 M                        |
| Calcium chloride        | 34 mM                        |
| Zinc sulphate           | 2.8 M                        |
| Sinigrin                | >5 M                         |

**Supplementary Table S6.** Summary of the predicted length of extracellular N-terminus and *N*-glycosylation sites in TAS2Rs.

| UniProt ID | Bitter taste receptor | Predicted length of extracellular N-terminus (number of amino acid residues) | <i>N</i> -glycosylation sites (amino acid position)* |
|------------|-----------------------|------------------------------------------------------------------------------|------------------------------------------------------|
| Q9NYW7     | TAS2R1                | 9                                                                            | 163                                                  |
| Q9NYW6     | TAS2R3                | 6                                                                            | 166                                                  |
| Q9NYW5     | TAS2R4                | 9                                                                            | 164, 165, 169                                        |
| Q9NYW4     | TAS2R5                | 1                                                                            | 155                                                  |
| Q9NYW3     | TAS2R7                | 9                                                                            | 167, 175                                             |
| Q9NYW2     | TAS2R8                | 7                                                                            | 167                                                  |
| Q9NYW1     | TAS2R9                | 9                                                                            | 164                                                  |
| Q9NYW0     | TAS2R10               | 6                                                                            | 92, 158                                              |
| Q9NYV9     | TAS2R13               | 7                                                                            | 162, 166                                             |
| Q9NYV8     | TAS2R14               | 7                                                                            | 153, <b>162</b> , <b>171</b>                         |
| Q9NYV7     | TAS2R16               | 1                                                                            | 80, <b>163</b>                                       |
| P59542     | TAS2R19               | 1                                                                            | 161                                                  |
| P59543     | TAS2R20               | 6                                                                            | 161, 176                                             |
| P59541     | TAS2R30               | 1                                                                            | 161, 176                                             |
| P59538     | TAS2R31               | 2                                                                            | 161                                                  |
| P59533     | TAS2R38               | 17                                                                           | 89, 178                                              |
| P59534     | TAS2R39               | 30                                                                           | 185, 194                                             |
| P59535     | TAS2R40               | 14                                                                           | 170, 179                                             |
| P59536     | TAS2R41               | 7                                                                            | 167                                                  |
| Q7RTR8     | TAS2R42               | 7                                                                            | 163                                                  |
| P59537     | TAS2R43               | 1                                                                            | 161, 176                                             |
| P59539     | TAS2R45               | 1                                                                            | 161                                                  |
| P59540     | TAS2R46               | 1                                                                            | <b>161</b> , 176                                     |
| P59544     | TAS2R50               | 1                                                                            | 161                                                  |
| P59551     | TAS2R60               | 7                                                                            | 179                                                  |

\*Numbers in bold indicate Asn residues that were reported to be *N*-glycosylated.<sup>29</sup>

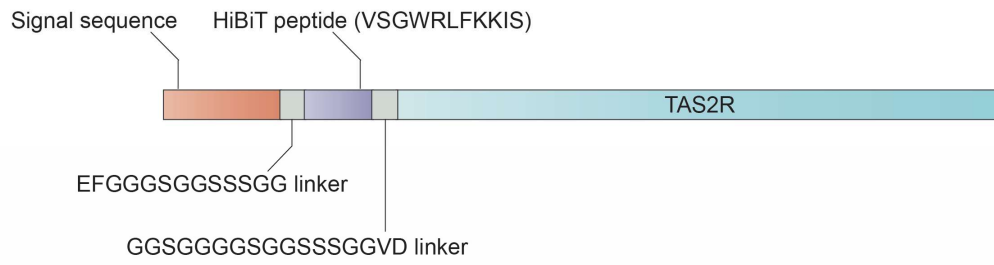

**Supplementary Figure S1.** The TAS2R construct used in the cell surface expression HiBiT assay consists of an N-terminal signal sequence fused to a HiBiT peptide, which is flanked by EFGGGSGGSSSGG and GGSGGGGSGGSSSGGVD linkers. This figure was generated using Adobe Illustrator (Version 25.4.1).

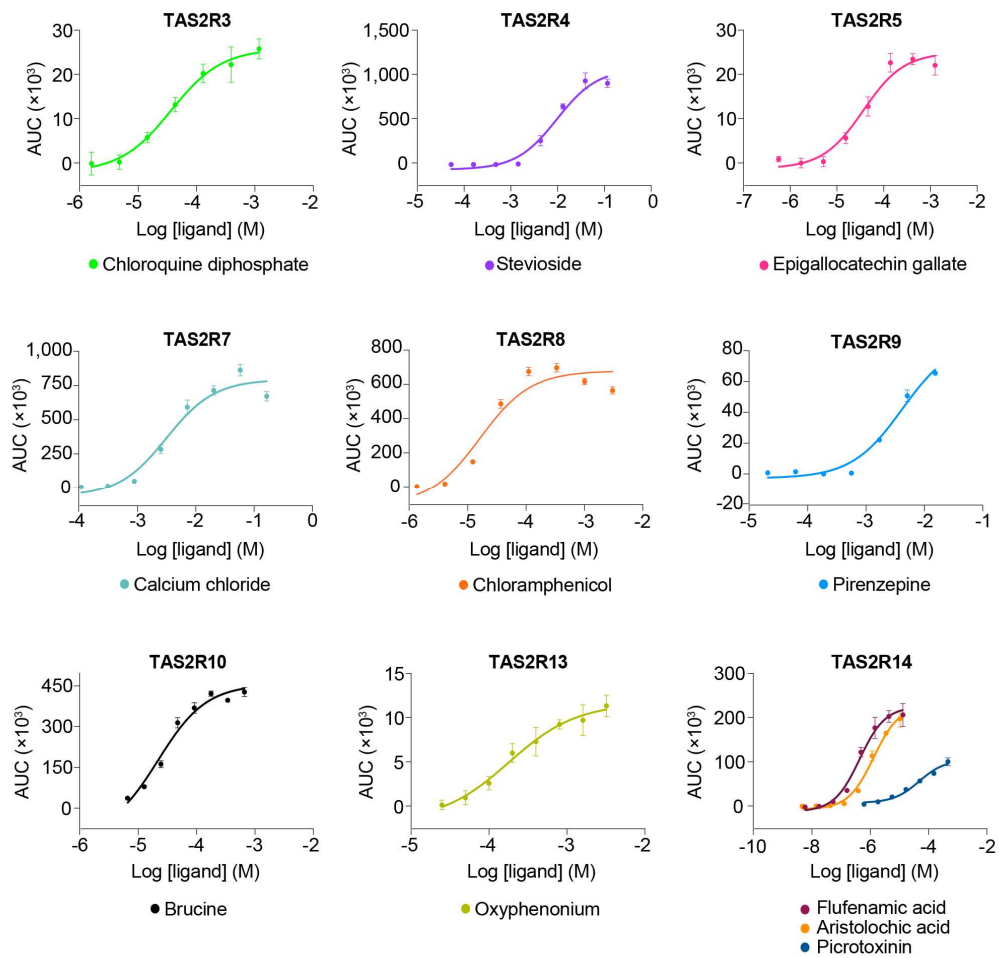

Supplementary Figure S2. (continued)



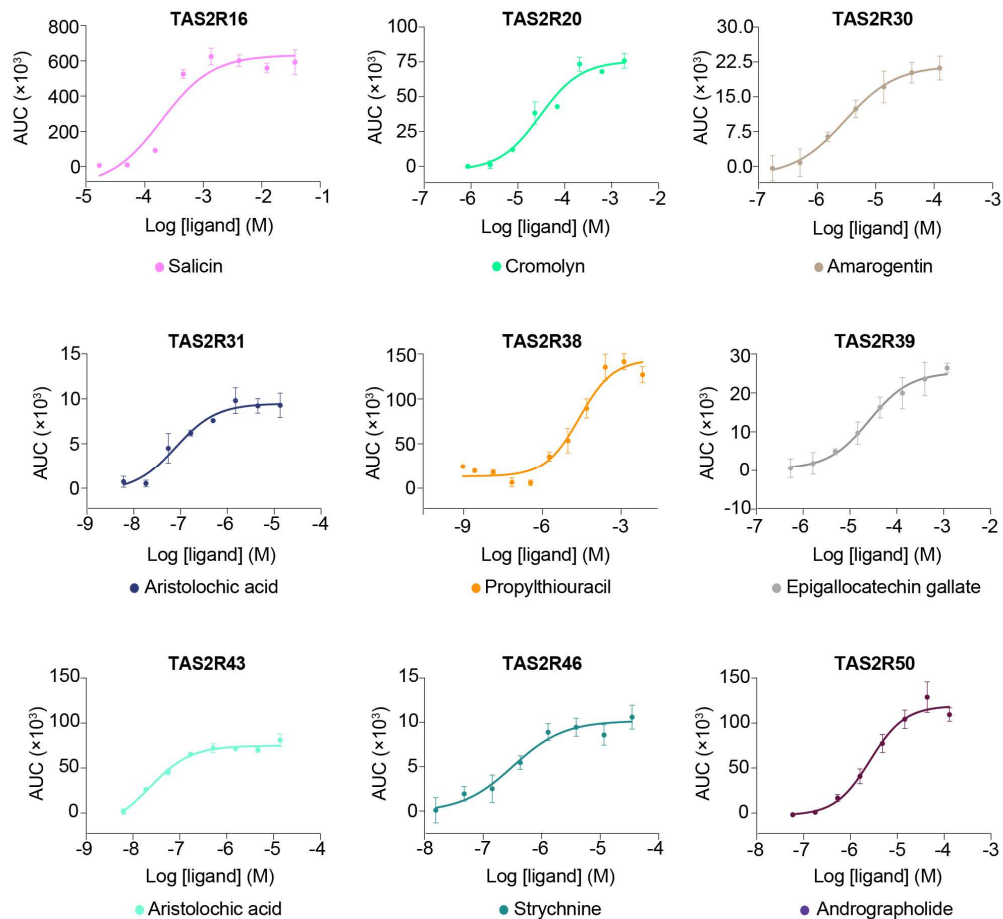

**Supplementary Figure S2.** Concentration-response curves of TAS2Rs upon stimulation with their cognate agonists in the bioluminescence-based intracellular calcium release assay in 293AD cells. Data points are shown as mean  $\pm$  s.e.m. from a representative experiment out of three independent biological replicates performed in technical quadruplicates.

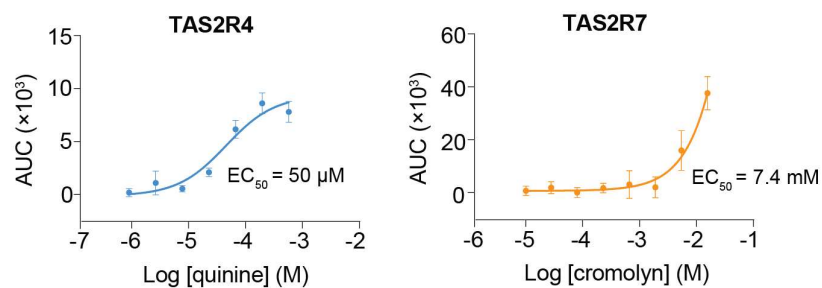

**Supplementary Figure S3.** Concentration-response curves of TAS2R4/7 upon stimulation with their agonists in the bioluminescence-based intracellular calcium release assay in AD-293 cells. The potency value of cromolyn ( $EC_{50} = 7.4$  mM) obtained was similar to that reported in literature ( $EC_{50} = 5.9$ - $6.67$  mM).<sup>4</sup> While no potency value was reported for quinine against TAS2R4, our experimentally derived potency value ( $EC_{50} = 50$   $\mu$ M) was close to its reported minimal effective concentration (10  $\mu$ M) that elicited response from TAS2R4-expressing cells.<sup>1</sup> Data points are shown as mean  $\pm$  s.e.m. from a representative experiment out of two independent biological replicates performed in technical quadruplicates.

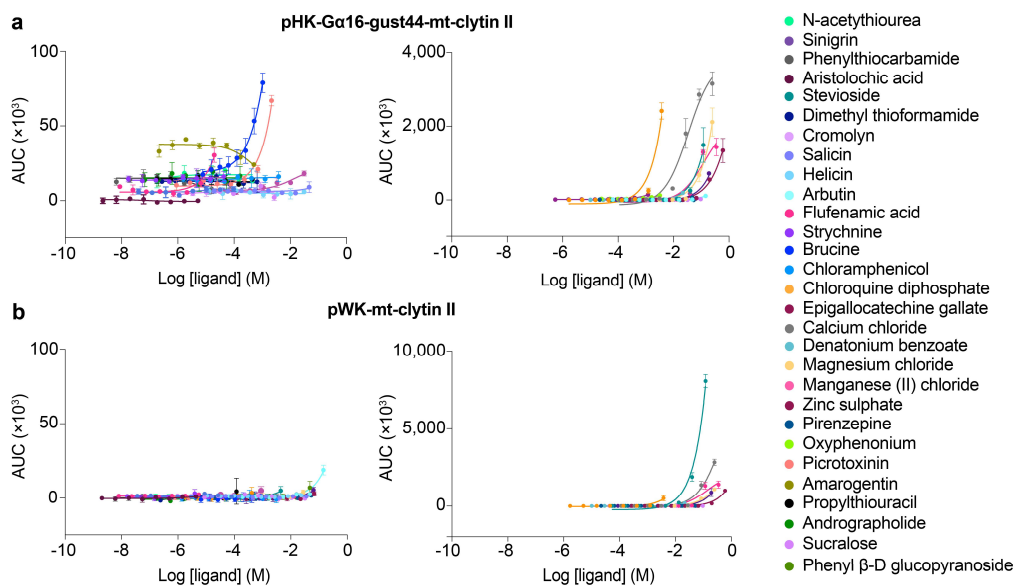

**Supplementary Figure S4.** Concentration-response curves of TAS2R agonists in cells transfected to express either a) Gα16-gust44 and mt-clytin II, or b) solely mt-clytin II. Data points are shown as mean ± s.e.m. from a representative experiment out of three independent biological replicates performed in technical quadruplicates.

**a** pHK-G $\alpha$ 16-gust44-mt-clytin II

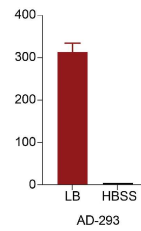

**b** pWK-mt-clytin II

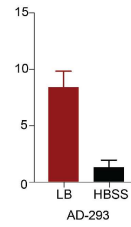

**Supplementary Figure S5.** Activation of calcium responses by LB medium and HBSS in AD-293 cells transfected to express a) both G $\alpha$ 16-gust44 and mt-clytin II, or b) solely mt-clytin II. Data points are shown as mean  $\pm$  s.e.m. from a representative experiment out of two independent biological replicates performed in technical quadruplicates.

## References

1. Meyerhof, W. *et al.* The molecular receptive ranges of human TAS2R bitter taste receptors. *Chem. Senses* **35**, 157–170 (2009).
2. Hellfritsch, C., Brockho, A., Sta, F., Meyerhof, W. & Hofmann, T. Human psychometric and taste receptor responses to steviol glycosides. *J. Agric. Food Chem.* **60**, 6781–6793 (2012).
3. Soares, S. *et al.* Human bitter taste receptors are activated by different classes of polyphenols. *J. Agric. Food Chem.* **66**, 8814–8823 (2018).
4. Wang, Y. *et al.* Metal ions activate the human taste receptor TAS2R7. *Chem. Senses* **44**, 339–347 (2019).
5. Behrens, M., Redel, U., Blank, K. & Meyerhof, W. The human bitter taste receptor TAS2R7 facilitates the detection of bitter salts. *Biochem. Biophys. Res. Commun.* **512**, 877–881 (2019).
6. Fotsing, J. R. *et al.* Discovery and development of S6821 and S7958 as potent TAS2R8 antagonists. *J. Med. Chem.* **63**, 4957–4977 (2020).
7. Dotson, C. D. *et al.* Bitter taste receptors influence glucose homeostasis. *PLoS One* **3**, e3974 <https://doi.org/10.1371/journal.pone.0003974> (2008).
8. Di Pizio, A. *et al.* Rational design of agonists for bitter taste receptor TAS2R14: from modeling to bench and back. *Cell. Mol. Life Sci.* **77**, 531–542 (2020).
9. Yamazaki, T., Narukawa, M., Mochizuki, M., Misaka, T. & Watanabe, T. Activation of the hTAS2R14 human bitter-taste receptor by (-)-epigallocatechin gallate and (-)-epicatechin gallate. *Biosci. Biotechnol. Biochem.* **77**, 1981–1983 (2013).
10. Nowak, S. *et al.* Reengineering the ligand sensitivity of the broadly tuned human bitter taste receptor TAS2R14. *Biochim. Biophys. Acta - Gen. Subj.* **1862**, 2162–2173 (2018).
11. Behrens, M. *et al.* The human taste receptor hTAS2R14 responds to a variety of different bitter compounds. *Biochem. Biophys. Res. Commun.* **319**, 479–485 (2004).
12. Soranzo, N. *et al.* Positive selection on a high-sensitivity allele of the human bitter-taste receptor TAS2R16. *Curr. Biol.* **15**, 1257–1265 (2005).
13. Kim, M. J., Son, H. J., Kim, Y., Misaka, T. & Rhyu, M. R. Umami-bitter interactions: The suppression of bitterness by umami peptides via human bitter taste receptor. *Biochem. Biophys. Res. Commun.* **456**, 586–590 (2015).
14. Sakurai, T. *et al.* Characterization of the  $\beta$ -D-glucopyranoside binding site of the human bitter taste receptor hTAS2R16. *J. Biol. Chem.* **285**, 28373–28378 (2010).
15. Bufo, B., Hofmann, T., Krautwurst, D., Raguse, J. D. & Meyerhof, W. The human TAS2R16 receptor mediates bitter taste in response to  $\beta$ -glucopyranosides. *Nat. Genet.* **32**, 397–401 (2002).
16. Ji, M. *et al.* Identification of novel compounds for human bitter taste receptors. *Chem. Biol. Drug Des.* **84**, 63–74 (2014).
17. Jaggupilli, A. *et al.* Chemosensory bitter taste receptors (T2Rs) are activated by multiple antibiotics. *FASEB J.* **33**, 501–517 (2019).
18. Slack, J. P. *et al.* Modulation of bitter taste perception by a small molecule hTAS2R antagonist. *Curr. Biol.* **20**, 1104–1109 (2010).
19. Pronin, A. N. *et al.* Specific alleles of bitter receptor genes influence human sensitivity to the bitterness of aloin and saccharin. *Curr. Biol.* **17**, 1403–1408

- (2007).
20. Behrens, M., Gunn, H. C., Ramos, P. C. M., Meyerhof, W. & Wooding, S. P. Genetic, functional, and phenotypic diversity in TAS2R38-mediated bitter taste perception. *Chem. Senses* **38**, 475–484 (2013).
  21. Sandau, M. M., Goodman, J. R., Thomas, A., Rucker, J. B. & Rawson, N. E. A functional comparison of the domestic cat bitter receptors Tas2r38 and Tas2r43 with their human orthologs. *BMC Neurosci.* **16**, 1–11 (2015).
  22. Greene, T. A. *et al.* Probenecid inhibits the human bitter taste receptor TAS2R16 and suppresses bitter perception of salicin. *PLoS One* **6**, e20123 <https://doi.org/10.1371/journal.pone.002012> (2011).
  23. Roland, W. S. U. *et al.* Bitter taste receptor activation by flavonoids and isoflavonoids: Modeled structural requirements for activation of hTAS2R14 and hTAS2R39. *J. Agric. Food Chem.* **61**, 10454–10466 (2013).
  24. Narukawa, M. *et al.* Evaluation of the bitterness of green tea catechins by a cell-based assay with the human bitter taste receptor hTAS2R39. *Biochem. Biophys. Res. Commun.* **405**, 620–625 (2011).
  25. Suess, B., Brockhoff, A., Meyerhof, W. & Hofmann, T. The odorant (R)-citronellal attenuates caffeine bitterness by inhibiting the bitter receptors TAS2R43 and TAS2R46. *J. Agric. Food Chem.* **66**, 2301–2311 (2018).
  26. Brockhoff, A. *et al.* Receptor agonism and antagonism of dietary bitter compounds. *J. Neurosci.* **31**, 14775–14872 (2011).
  27. Brockhoff, A., Behrens, M., Massarotti, A., Appending, G. & Meyerhof, W. Broad tuning of the human bitter taste receptor hTAS2R46 to various sesquiterpene lactones, clerodane and labdane diterpenoids, strychnine, and denatonium. *J. Agric. Food Chem.* **55**, 6236–6243 (2007).
  28. Kuroda, Y. *et al.* Activation of human bitter taste receptors by polymethoxylated flavonoids. *Biosci. Biotechnol. Biochem.* **80**, 2014–2017 (2016).
  29. Reichling, C., Meyerhof, W. & Behrens, M. Functions of human bitter taste receptors depend on N-glycosylation. *J. Neurochem.* **106**, 1138–1148 (2008).
